# Supplementary material
Source: Research Square preprint supplement (doi:10.21203/rs.3.rs-9784494/v1)
Supplement: Supplementary file 1 [file b72066c957dd41e1b3aff0da.docx]

**Supplemental Materials**

**Gun Violence Coding Procedures**

**Supplemental Table 1**

*Interrater Reliability Estimates*

| **Variable** | **Kappa** |
| --- | --- |
| 2019 Non-Domestic Homicide | .68 |
| 2019 Domestic Homicide | .73 |
| 2019 Suicide | .85 |
| 2020 Non-Domestic Homicide | .58 |
| 2020 Domestic Homicide | .72 |
| 2020 Suicide | .83 |

***Coding SOP***

Criteria for Suicide (intentional self-inflicted shooting):

- Mark 1 (present) if: It is clear the self-inflicted shooting was intentional; Victim’s death was ruled a suicide; A suicide attempt was made (i.e. person shot himself but survived)
- Mark 0 (absent) if: Victim was suicidal but was killed by someone else (i.e. police officer) - even if they encouraged the police to kill them, it’s not categorized as suicide; Victim self-inflicted the shooting but it was accidental/unintentional; Police state they are looking for suspects; Victim had multiple gunshot wounds

Criteria for Homicide (intentional shooting of other person):

- Mark 1 if: Victim’s death was ruled a homicide; News article states it is being investigated by homicide detectives; Killing was intentional; News article states they have a suspect in custody, are looking for a suspect, or a suspect was seen at the crime scene; There are multiple gunshot wounds – suicides with multiple gunshot wounds are highly unlikely
- Mark 0 if: Killing was an accident and there was NO intent to cause harm to another human being (e.g., child playing with a gun; hunting accident); Victim’s death was by suicide

Criteria for Domestic:

- Mark 1 if: Victim was killed/injured by relatives, spouses, ex/current romantic partners, and/or cohabitants; Victim and suspect appear to be related (i.e. have the same last name, lived in the same apartment/house); Police state they are not looking for suspects outside the home; The characteristics or notes or news reports suggest “domestic”; Someone’s ex-partner killed their new partner (e.g., ex-husband kills ex-wife's new boyfriend) - Motivation must be based on the previous domestic relationship
- Mark 0 if: Police arrived due to a domestic disturbance but victim was ultimately not killed by persons within the home or ex/current romantic relationships; Victim was found in the street or road or car; Shooting was unintentional

Criteria for Police Involved:

- Mark 1 if: Law Enforcement Officer (LEO) was involved in incident, either LEO killed a person or suicide/killing of others occurred due to police being there (e.g., siege); If an off-duty cop shoots the person; There was a shootout with police
- Mark 0 if: Police responded to a call of shots fired and victim was found injured or dead at the scene; Police chased the perp or were in high speed chase but the perp did not engage in suicide nor did police shoot the perp and there was no shootout; Security guards and/or retired/inactive/former officers involved in the situation

Criteria for Accidental Shootings:

- These are only situations in which there is NO intention to harm another human being (e.g., Hunting accidents; Playing with gun - common among young children; Thought gun was unloaded; Cleaning gun); Code 0 for every criterion if the shooting was accidental for all victims involved

Mark 99 (unknown/missing) if:

- There is no clear information for 0 and 1; Circumstances of the shooting are unclear; Unspecified number of gunshot wounds; Unspecified setting (home, street, etc.); There are no mention of suspects

***Training of Coders***

Research assistants completed a three-step process to ensure accurate and consistent coding of the data found in the Gun Violence Archives, including watching a training video, reading the standard operating procedure (SOP) manual, and coding practice questions with feedback from the trainer. Case completion was monitored by the trainer weekly to ensure sufficient time and attention was provided to each case, and that the coder maintained consistent coding. Research assistants also met with the trainer biweekly to discuss cases and coding; unusual cases (e.g., rare events not in the SOP) were discussed as a team until a consensus was reached. Finally, coders wrote detailed notes about each coded incident for later review if necessary.

***Gun Violence Incident Exclusions***

Out of 13,762 and 17,666 gun violence incidents that involved at least one death in the original 2019 and 2020 databases, respectively, 44 (.003%) in 2019 and 102 (.006%) in 2020 were excluded due to insufficient information (e.g., no online articles to review, too few details provided to code anything). In addition, 350 incidents in 2019 and 312 in 2020 were further excluded due to being coded as unintentional (accidental). As such

**Supplemental Table 2**

*Unemployment Rates and COVID-19 Deaths for 2019 and 2020*

|  | **2019** | **2020** | |
| --- | --- | --- | --- |
| **Month** | **Unemployment %**  **M (SD)** | **Unemployment %**  **M (SD)** | **COVID-19 Deaths**  **M (SD)** |
| January | 3.75 (.85) | 3.60 (.88) | 0 (0) |
| February | 3.71 (.85) | 3.67 (.90) | 0 (0) |
| March | 3.64 (.83) | 4.03 (1.19) | 190.95 (477.63) |
| April | 3.58 (.83) | 13.63 (4.26) | 1333.29 (3409.30) |
| May | 3.52 (.83) | 11.74 (3.49) | 830.63 (1112.98) |
| June | 3.49 (.84) | 9.94 (2.97) | 390.04 (432.92) |
| July | 3.51 (.84) | 8.95 (2.73) | 632.59 (1284.52) |
| August | 3.53 (.85) | 7.68 (2.32) | 608.08 (1078.96) |
| September | 3.54 (.83) | 7.10 (2.06) | 389.59 (503.83) |
| October | 3.53 (.83) | 6.37 (1.80) | 497.16 (493.00) |
| November | 3.53 (.83) | 6.12 (1.70) | 1041.92 (1001.75) |
| December | 3.55 (.85) | 5.99 (1.65) | 1920.27 (2288.43) |

**Supplementary Table 3**

*Gun Legislation Permissiveness: Giffords Score Card Grades*

| **Letter Grade (Values Assigned)** | **N (%) for 2019** | **N (%) for 2020** |
| --- | --- | --- |
| A+ (12) | 0 (0%) | 0 (0%) |
| A (11) | 2 (4%) | 2 (4%) |
| A- (10) | 6 (12%) | 6 (12%) |
| B+ (9) | 2 (4%) | 2 (4%) |
| B (8) | 1 (2%) | 2 (4%) |
| B- (7) | 0 (0%) | 0 (0%) |
| C+ (6) | 5 (1%) | 6 (12%) |
| C (5) | 4 (8%) | 3 (6%) |
| C- (4) | 3 (6%) | 3 (6%) |
| D+ (3) | 0 (0%) | 0 (0%) |
| D (2) | 4 (8%) | 4 (8%) |
| D- (1) | 2 (4%) | 1 (2%) |
| F (0) | 21 (42%) | 21 (42%) |
| *Mean (SD)* | *3.60 (3.95)* | *3.76 (3.99)* |
| *Median* | *2* | *2* |

**Coding the Slope and Disruption Parameters**

For each of the three slope variables (Slopes 1-3), the coding was as following: 1 = the first month of the designated time period; for each month progressed within each time period, 1 is added to the previous value; months occurring before the current time period are all coded as 0; months occurred after the current time period are coded as the same value as the last month in the current time period). The disruption variables were coded such that 0 = months prior to or after the current time period and 1 = months within the current time period. See Supplemental Table 1 below for the exact coding scheme. Covariates in each model included state-level variables of rating of gun laws, unemployment rate, poverty rate, COVID-19 deaths, and COVID-19 restrictiveness.

**Supplemental Table 4.** *Coding of Time Series Parameters in Analyses*

| **Month** | January | February | March | April | May | June | July | August | September | October | November | December |
| --- | --- | --- | --- | --- | --- | --- | --- | --- | --- | --- | --- | --- |
| **January to March Slope (Slope1)** | 1 | 2 | 3 | 3 | 3 | 3 | 3 | 3 | 3 | 3 | 3 | 3 |
| **April to June Slope (Slope2)** | 0 | 0 | 0 | 1 | 2 | 3 | 3 | 3 | 3 | 3 | 3 | 3 |
| **July to December Slope (Slope 3)** | 0 | 0 | 0 | 0 | 0 | 0 | 1 | 2 | 3 | 4 | 5 | 6 |
| **March to April Intercept Change (Disrupt1)** | 0 | 0 | 0 | 1 | 1 | 1 | 0 | 0 | 0 | 0 | 0 | 0 |
| **June to July Intercept Change (Disrupt2)** | 0 | 0 | 0 | 0 | 0 | 0 | 1 | 1 | 1 | 1 | 1 | 1 |

**Supplemental Table 5.**

*Hypothesis 1.1 Covariates Results*

| **Covariate** | **2020 Total GV** | **2020 Domestic** | **2020 Homicide** | **2020 Suicide** | **2019 Total GV** | **2019 Domestic** | **2019 Homicide** | **2019 Suicide** |
| --- | --- | --- | --- | --- | --- | --- | --- | --- |
| Population | 1.122 (p < .001) | 1.095 (p < .001) | 1.124 (p < .001) | 1.093 (p < .001) | 1.121 (p < .001) | 1.103 (p < .001) | 1.123 (p < .001) | 1.093 (p < .001) |
| Gun Law Grade | 1.029 (p = 0.414) | 0.953 (p = 0.099) | 1.036 (p = 0.321) | 0.974 (p = 0.352) | 1.012 (p = 0.72) | 0.937 (p = 0.035) | 1.02 (p = 0.581) | 0.94 (p = 0.006) |
| COVID Deaths | 0.999 (p = 0.175) | 1.00 (p = 0.836) | 0.999 (p = 0.107) | 1.001 (p = 0.489) | — | — | — | — |
| Percent Unemployed | 1.006 (p = 0.503) | 1.019 (p = 0.323) | 1.005 (p = 0.569) | 1.00 (p = 0.724) | 1.004 (p = 0.952) | 1.05 (p = 0.702) | 1.004 (p = 0.958) | 1.174 (p = 0.123) |
| Poverty Rate | 1.232 (p < .001) | 1.162 (p < .001) | 1.249 (p < .001) | 1.088 (p = 0.033) | 1.216 (p < .001) | 1.151 (p = 0.004) | 1.236 (p < .001) | 1.028 (p = 0.461) |

**Supplemental Table 6.**

*Hypothesis 1.2 Covariates Results*

| **Covariate** | **2020 Domestic** | **2020 Homicide** | **2020 Suicide** |
| --- | --- | --- | --- |
| Percent Unemployed | 1.014 (p = .477) | 1.002 (p = .786) | 0.99 (p = .665) |
| COVID Deaths | 1.000 (p = .782) | 0.999 (p = .111) | 1.001 (p = .456) |
| Population | 1.094 (p < .001) | 1.123 (p < .001) | 1.093 (p < .001) |
| Poverty Rate | 1.159 (p < .001) | 1.246 (p < .001) | 1.088 (p = .034) |
| Gun Law Grade (numeric) | 0.950 (p = .084) | 1.034 (p = .359) | 0.975 (p = .368) |
| Sum of State-Level COVID Safety Restrictions | 1.004 (p = .959) | 1.021 (p = .572) | 0.918 (p = .408) |

**Supplemental Table 7.**

*Aim 2 Covariates Results*

| **Covariate** | **2020 Domestic** | **2020 Homicide** | **2020 Suicide** | **2019 Domestic** | **2019 Homicide** | **2019 Suicide** |
| --- | --- | --- | --- | --- | --- | --- |
| Population | 1.029 (p < .001) | 1.062 (p < .001) | 1.025 (p < .001) | 1.036 (p < .001) | 1.074 (p < .001) | 1.037 (p < .001) |
| Gun Law Grade (numeric) | 0.976 (p = .047) | 1.078 (p < .001) | 0.999 (p = .927) | 0.965 (p = .003) | 1.041 (p < .001) | 0.967 (p = .006) |
| COVID Deaths | 0.998 (p = .367) | 0.997 (p = .204) | 1.00 (p = .954) | — | — | — |
| Percent Unemployed | 0.982 (p = .207) | 0.959 (p = .003) | 0.999 (p = .959) | 0.976 (p = .670) | 0.966 (p = .547) | 1.122 (p = .050) |
| Poverty Rate | 1.132 (p < .001) | 1.221 (p < .001) | 1.063 (p = .001) | 1.146 (p < .001) | 1.199 (p < .001) | 1.029 (p = .152) |
